# Supplementary material for: Synthesis and characterization of novel nanosilica molybdic acid and its first catalytic application in the synthesis of new and known pyranocoumarins
Source: Royal Society of Chemistry journal article supplement (doi:10.1039/c5nj01302j), 2015-01-01

## **\*Supplementary data\***

### **Synthesis and characterization of novel nanosilica molybdic acid and its first catalytic application in synthesis of new and known pyranocoumarins**

Bahador Karami,\* Mahtab Kiani, S. Jafar Hosseini and Mehrangiz  
Bahrami

E-mail: [karami@mail.yu.ac.ir](mailto:karami@mail.yu.ac.ir)

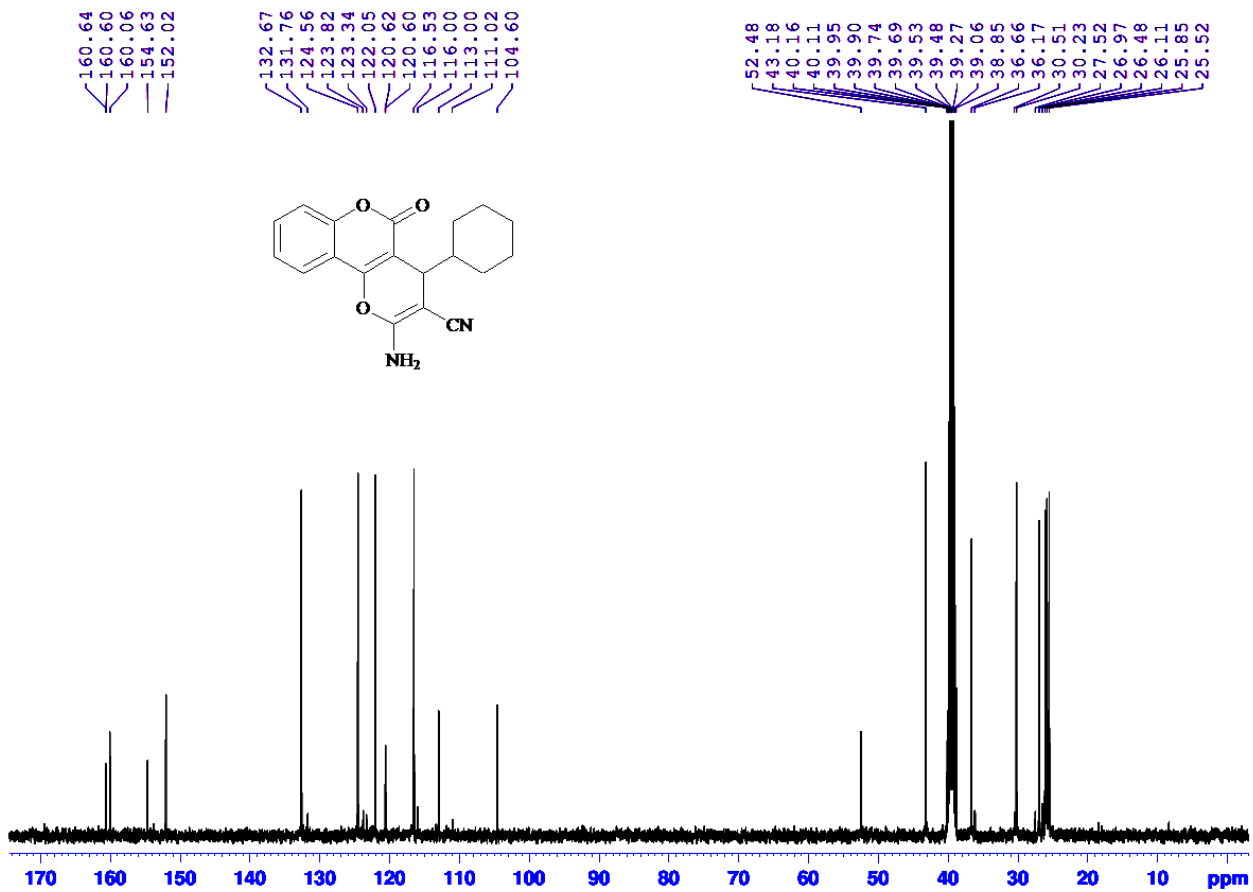

7.8096  
7.7230  
7.7190  
7.7047  
7.7014  
7.6983  
7.6838  
7.6798  
7.4876  
7.4798  
7.4777  
7.4665  
7.4608  
7.4420  
7.4396  
7.3552

4.4392

1.7511  
1.7204  
1.6360  
1.6061  
1.5833  
1.5763  
1.3860  
1.3591  
1.3534  
1.3294  
1.3212  
1.1851  
1.1538  
1.1220  
1.1155  
1.0845  
1.0754  
1.0578  
1.0402

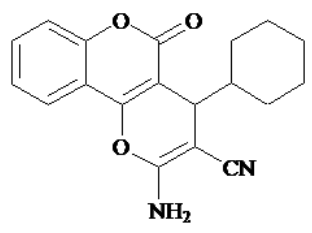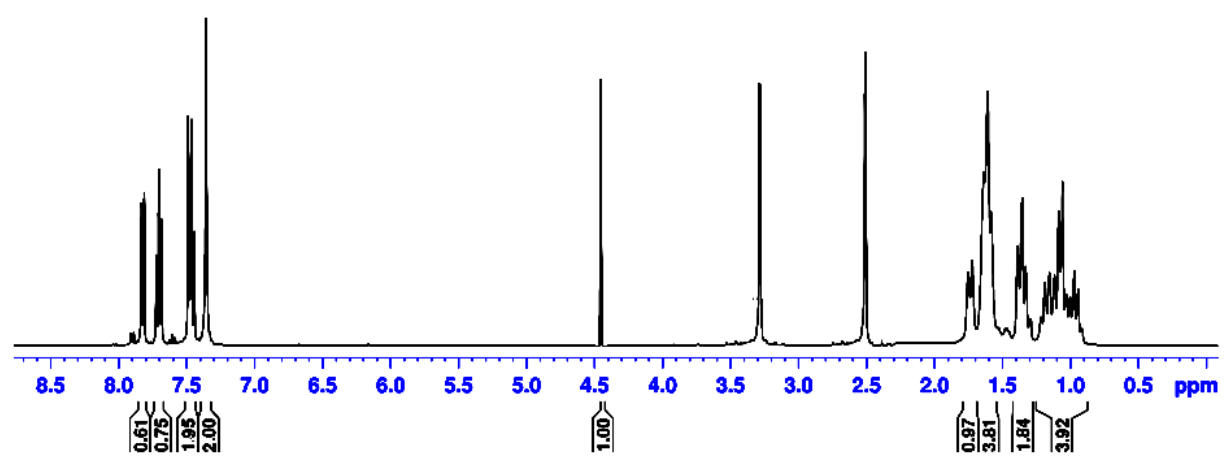

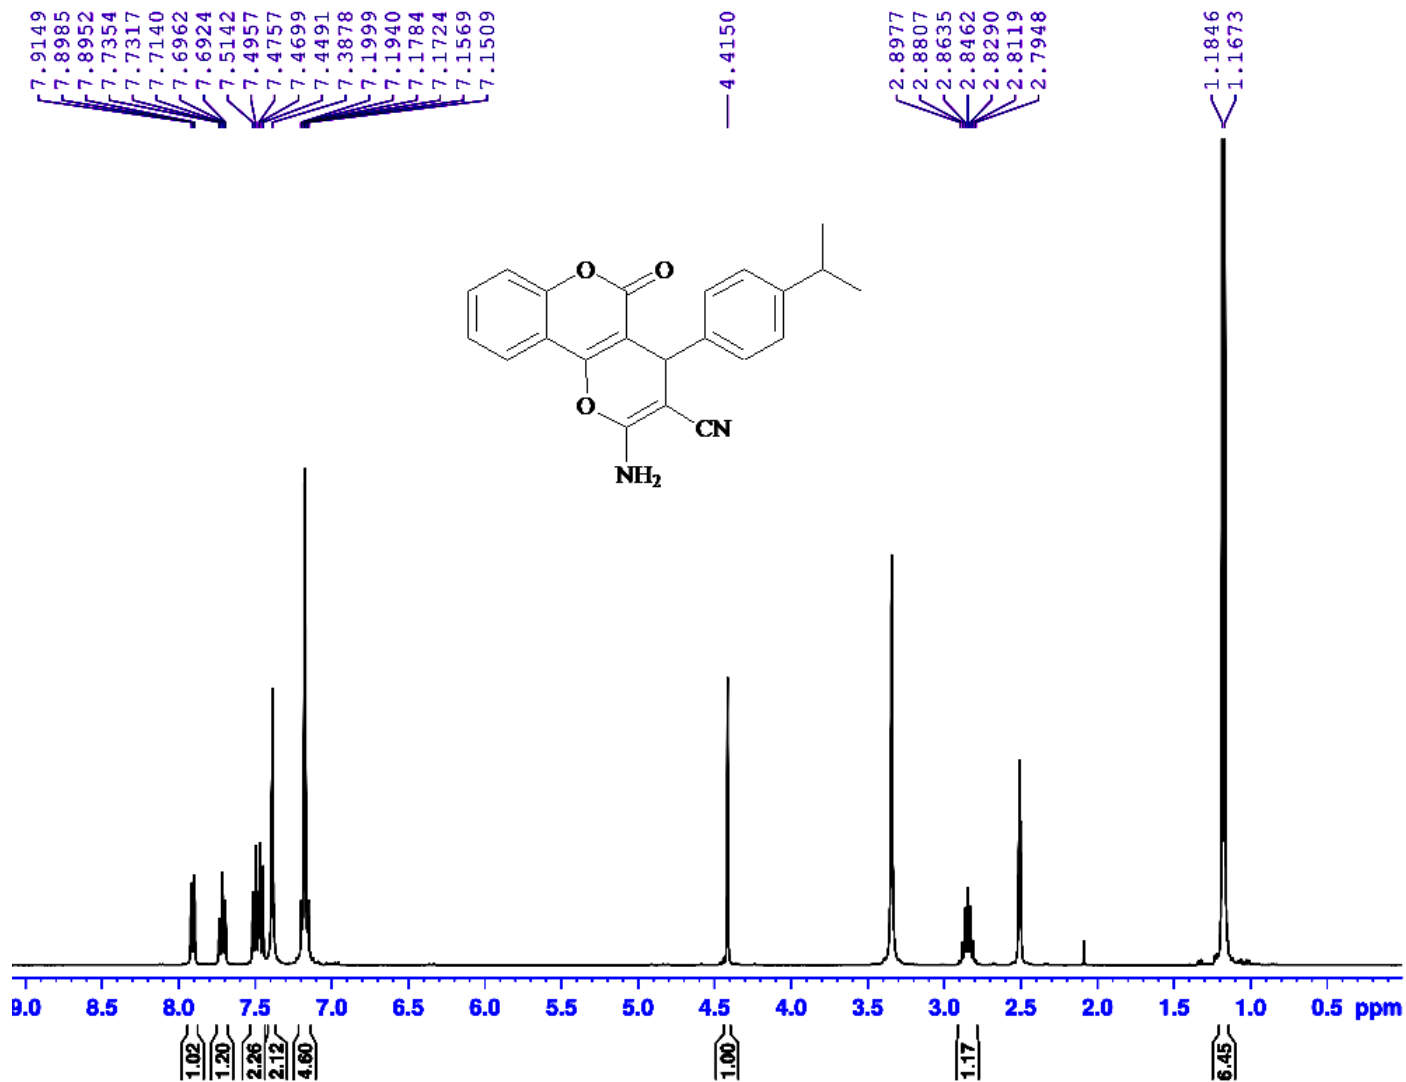

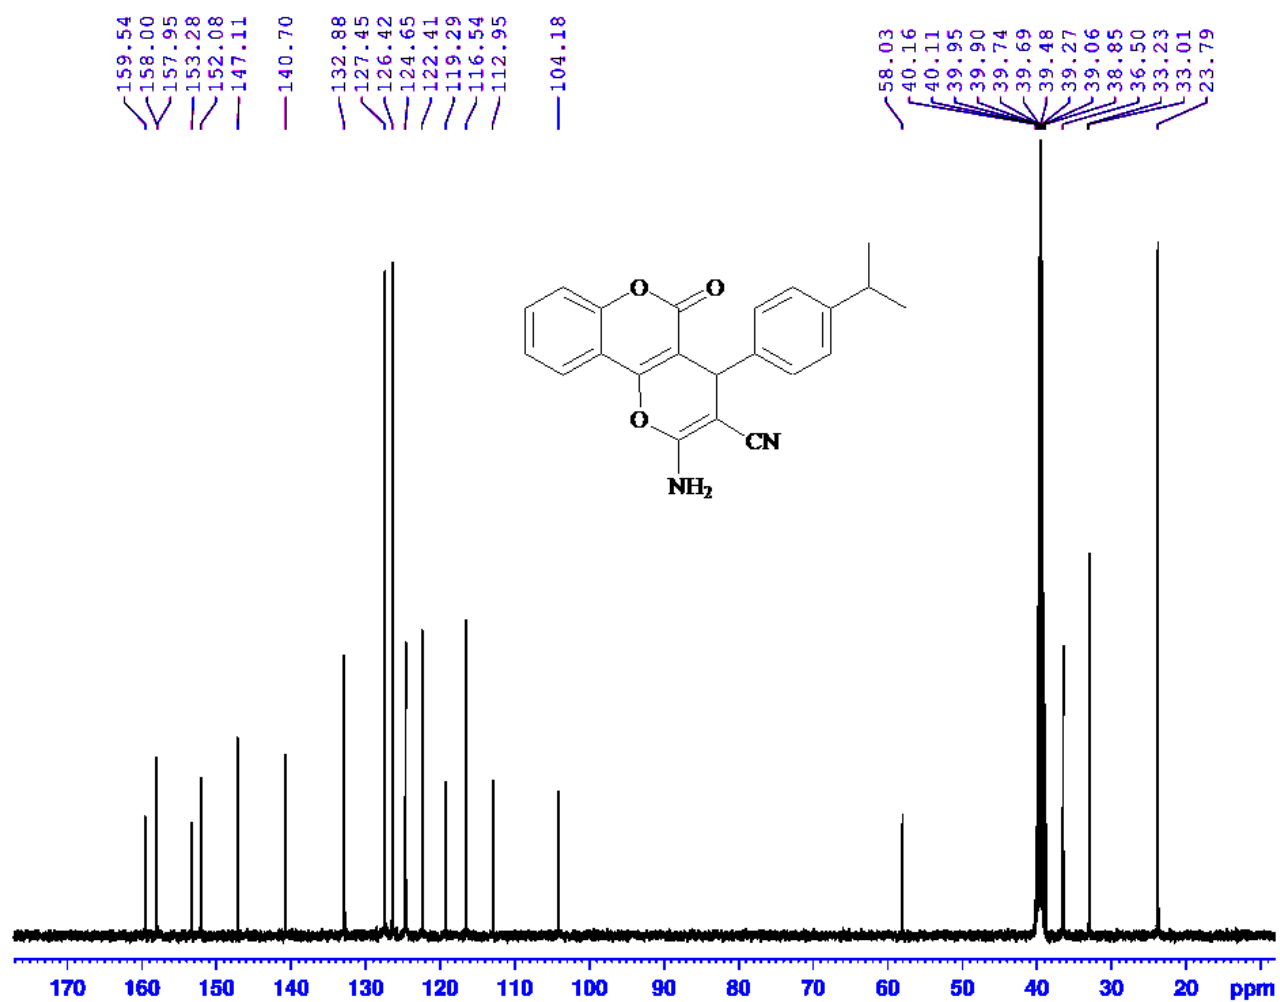

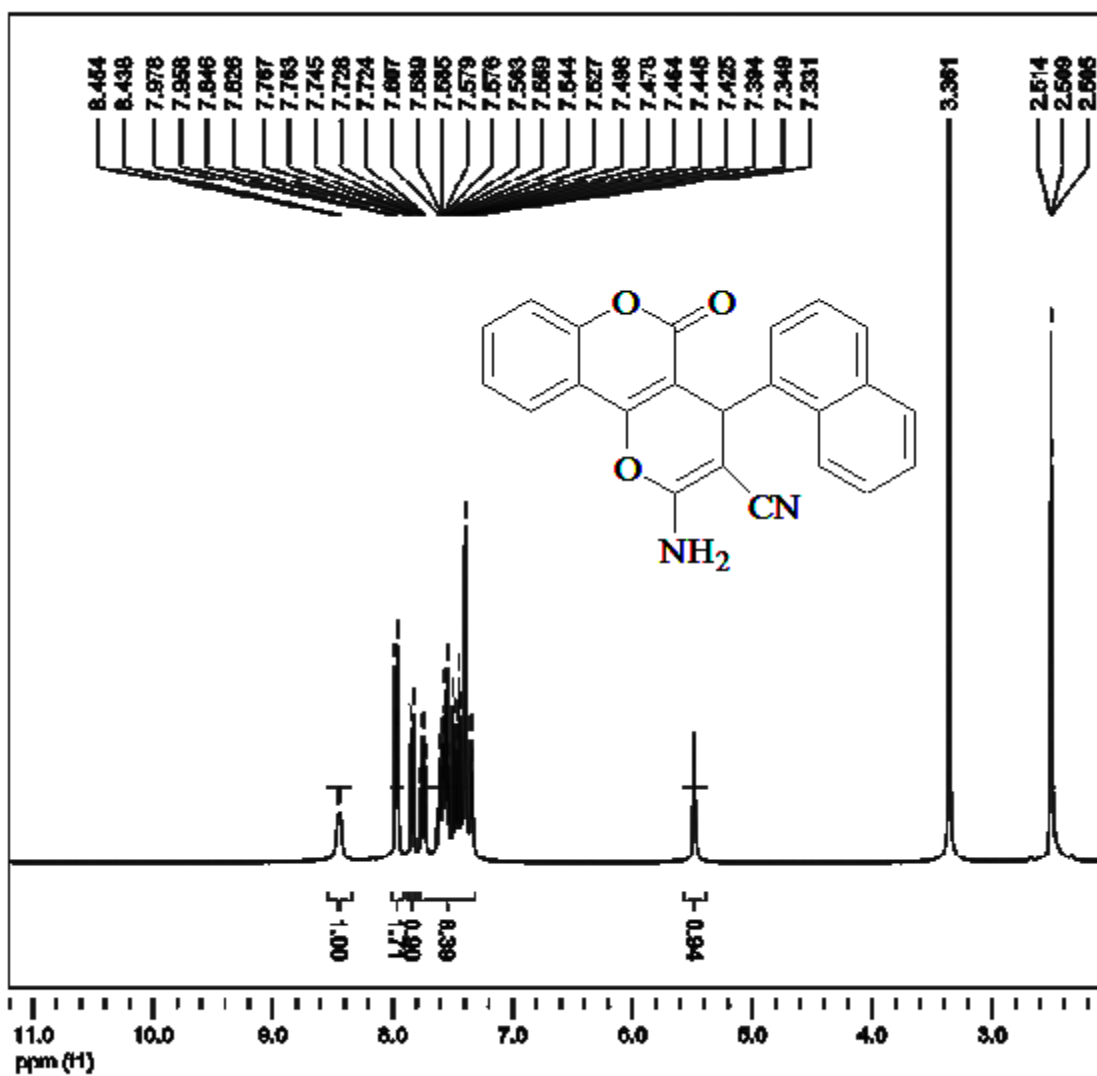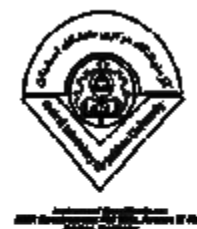

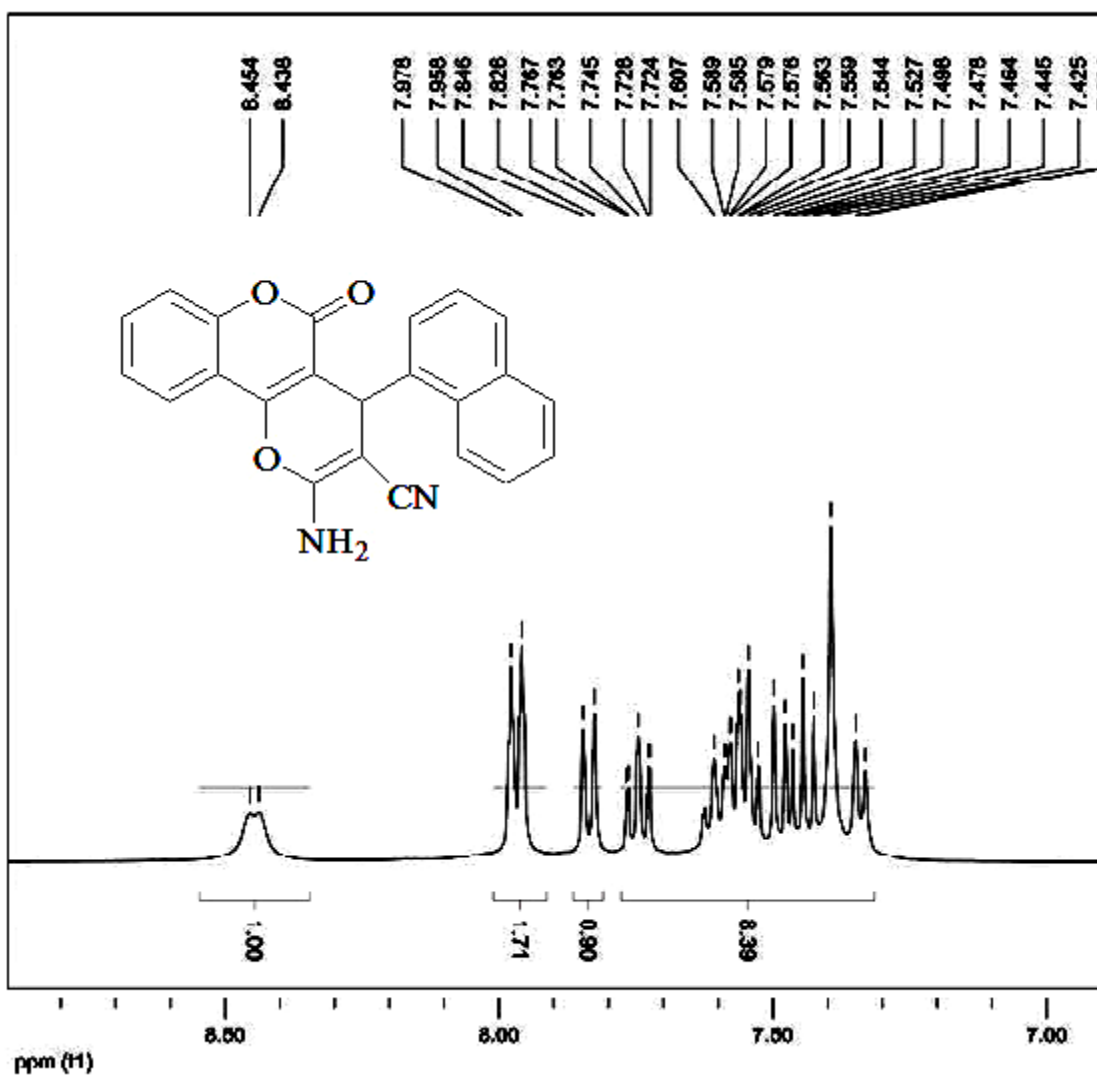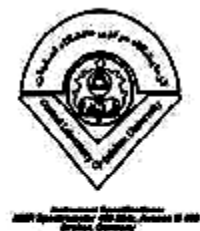

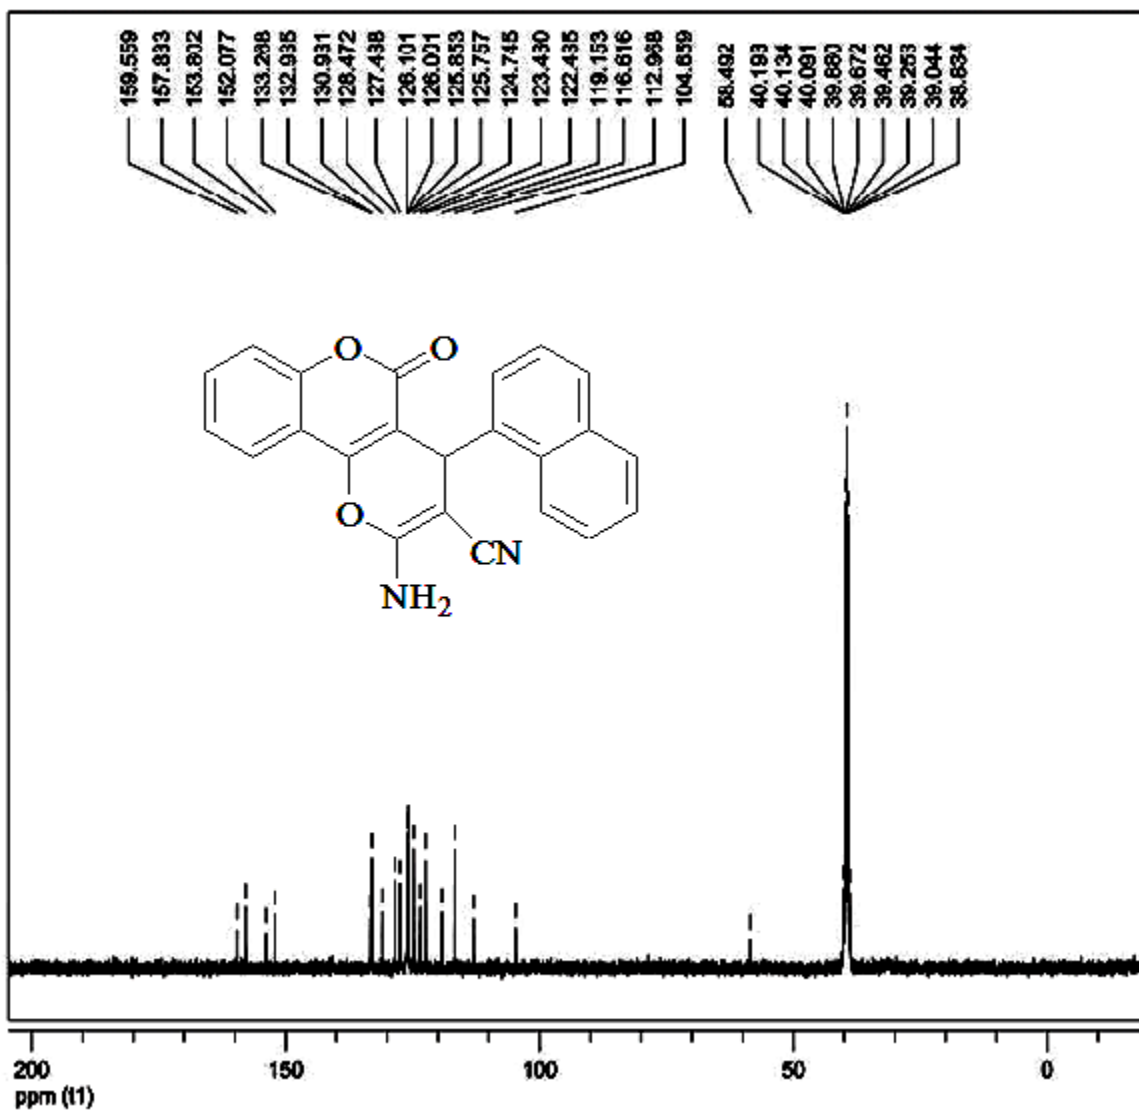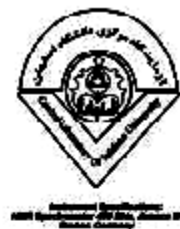



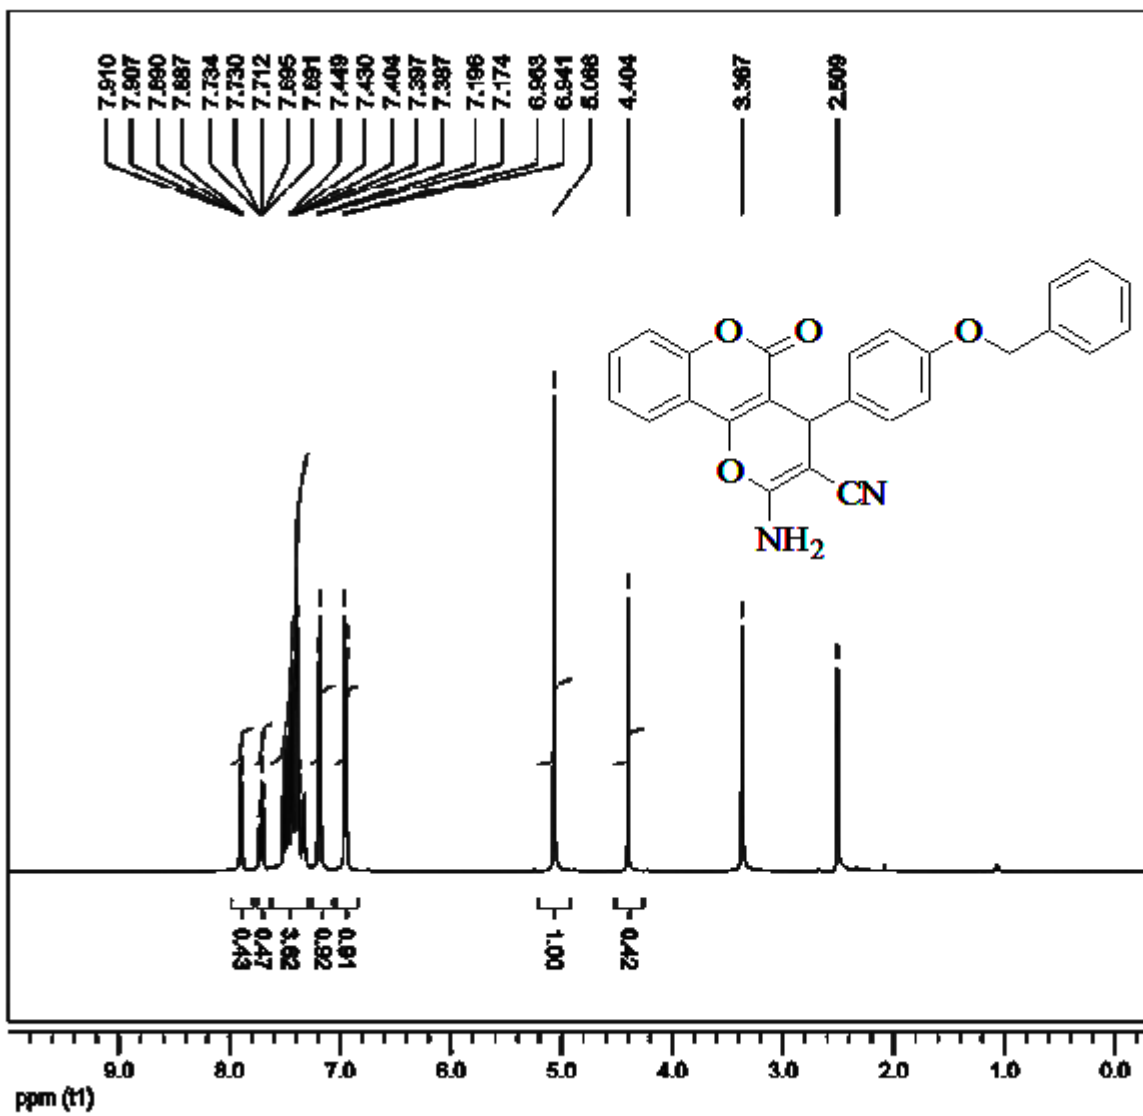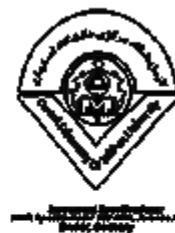

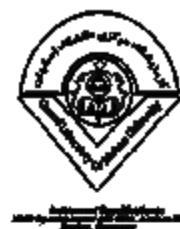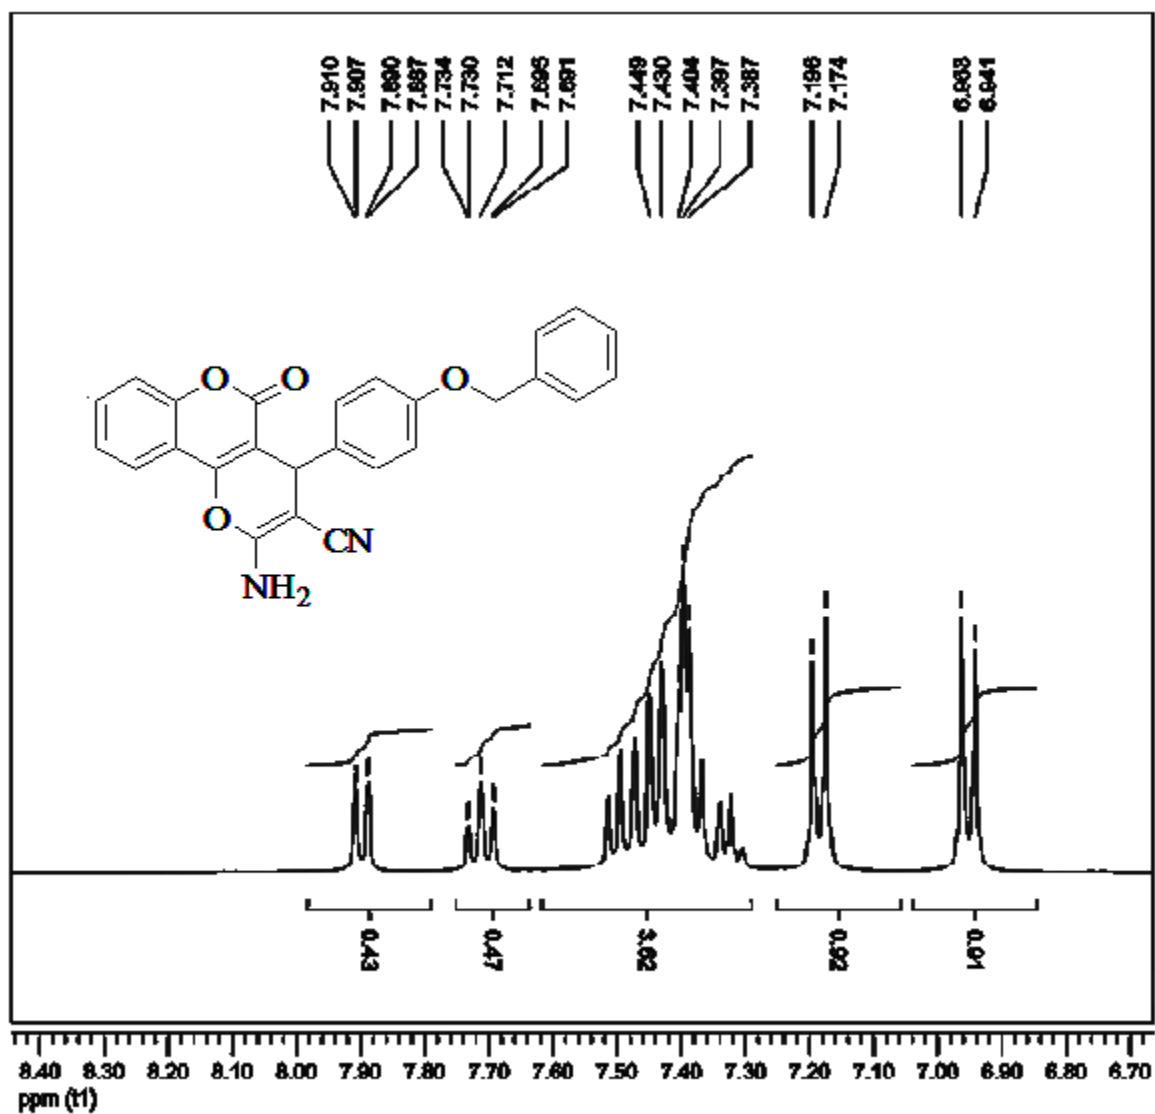

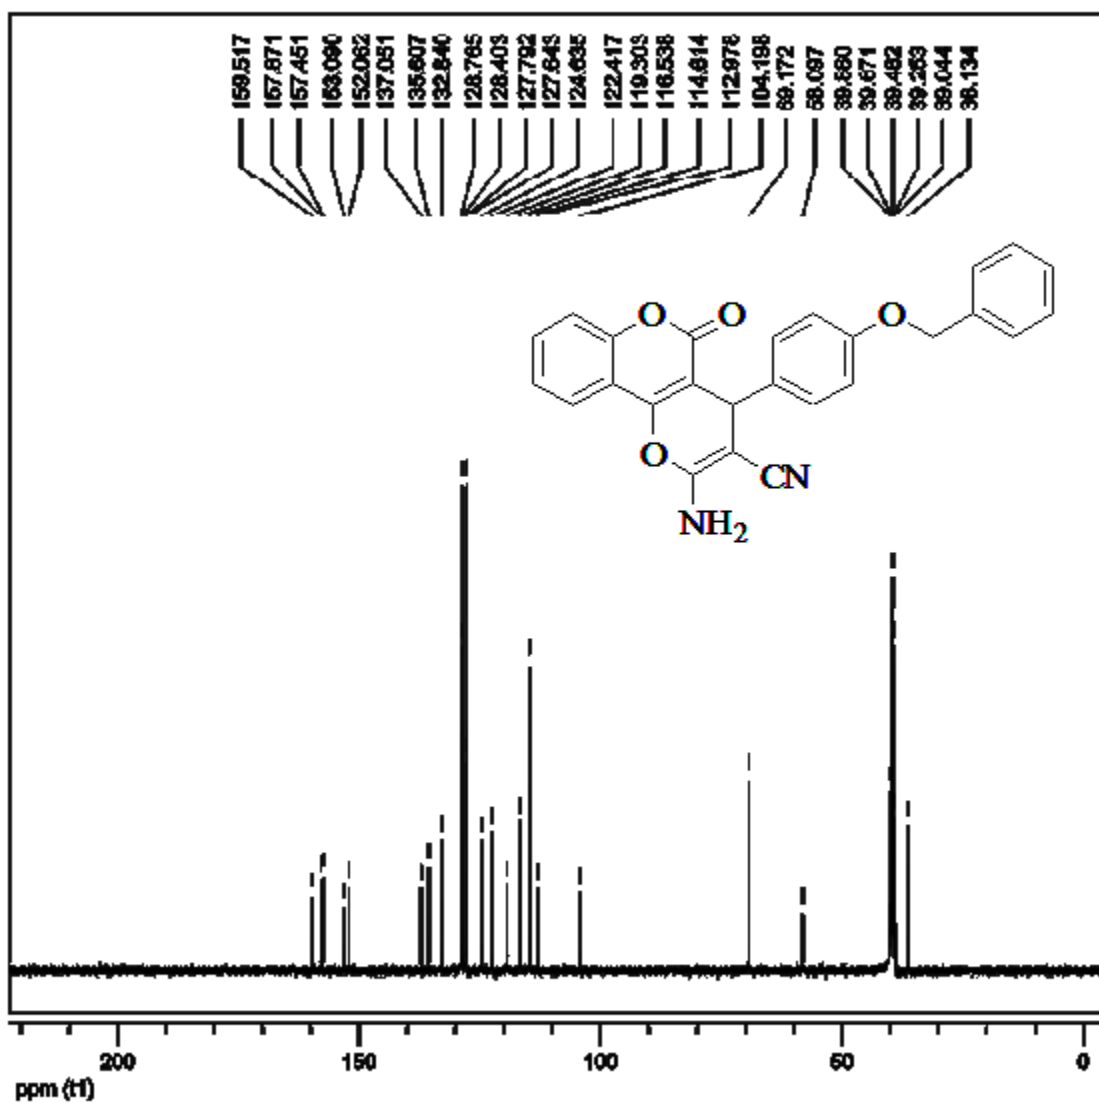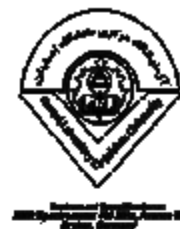

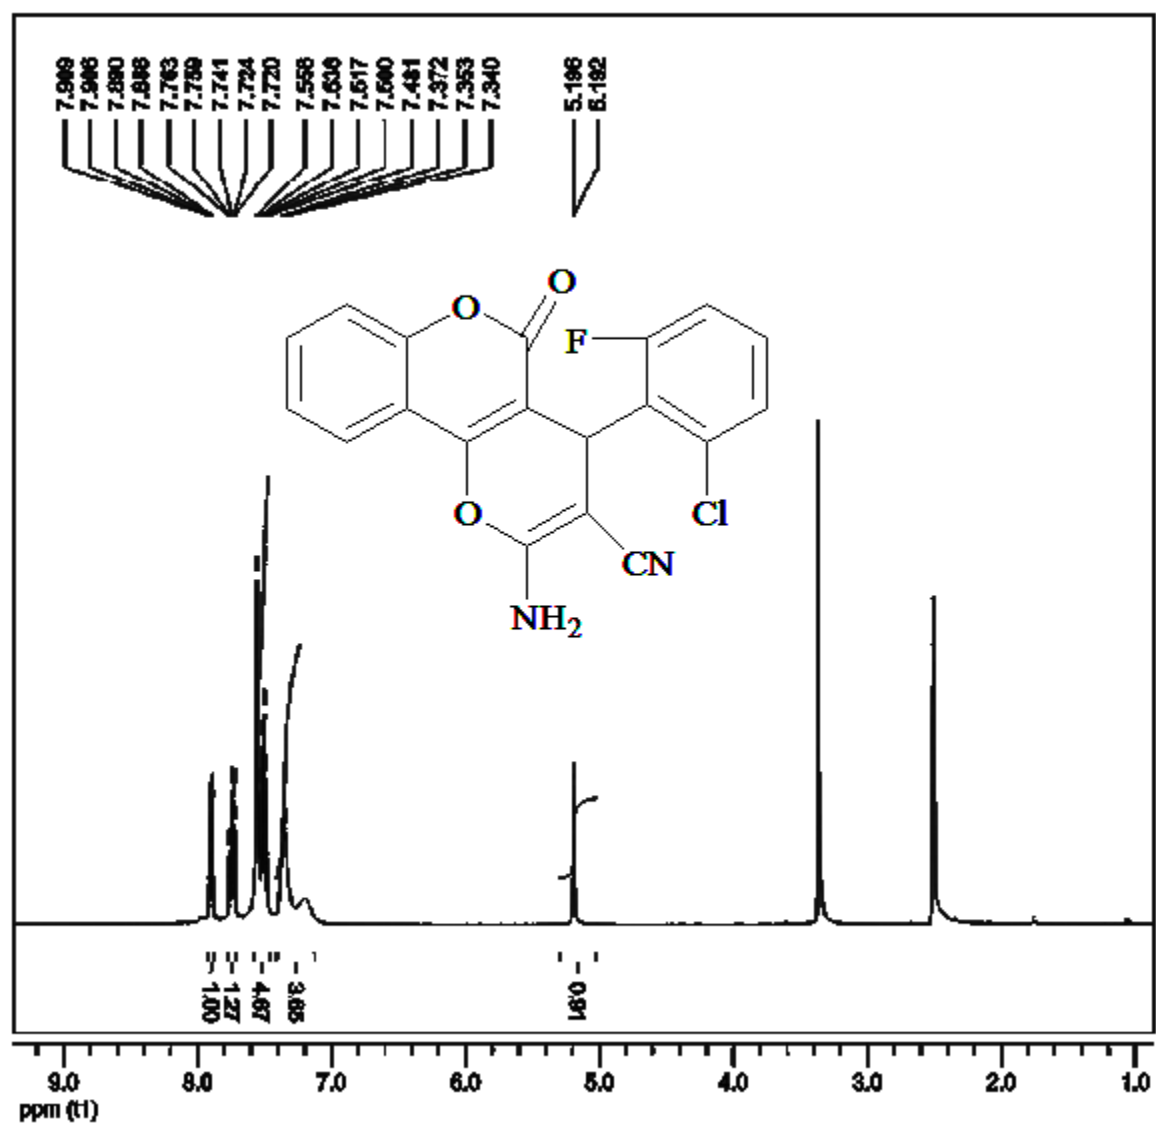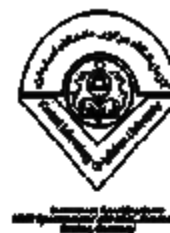

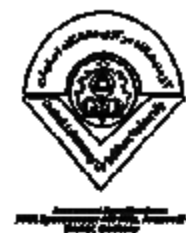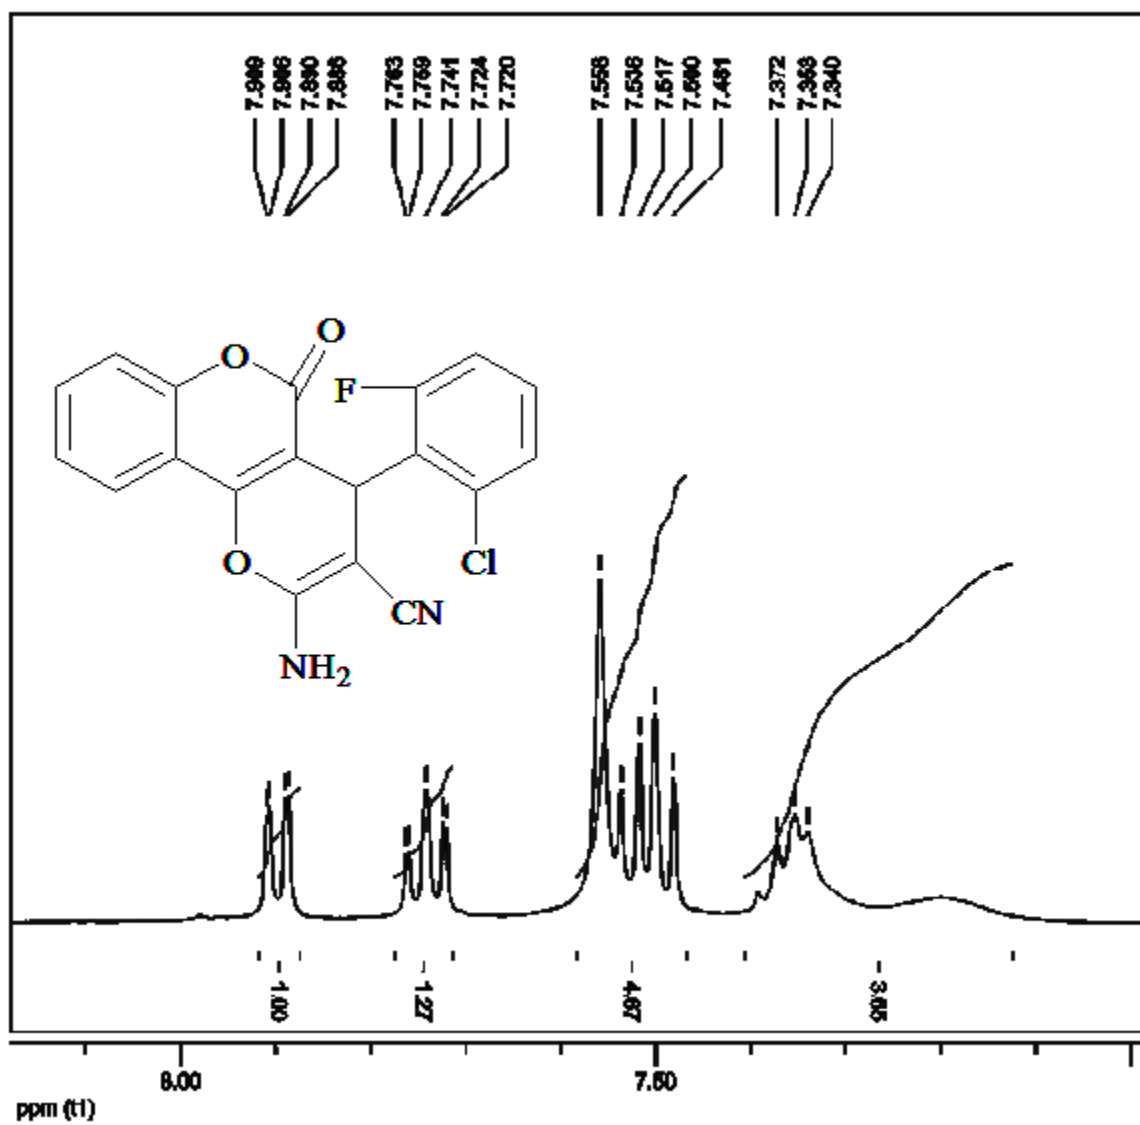

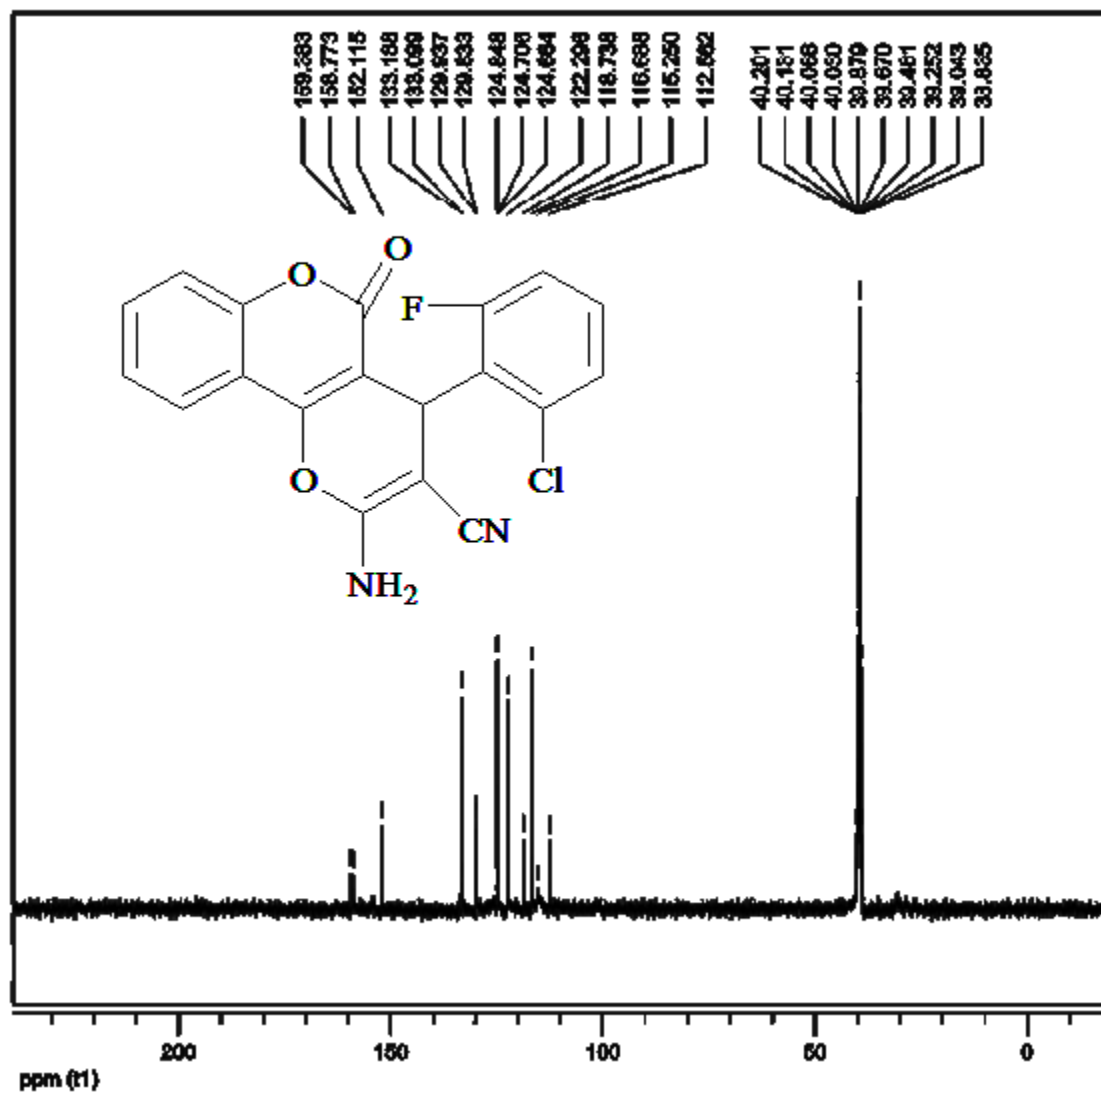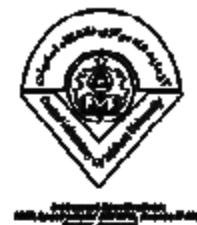

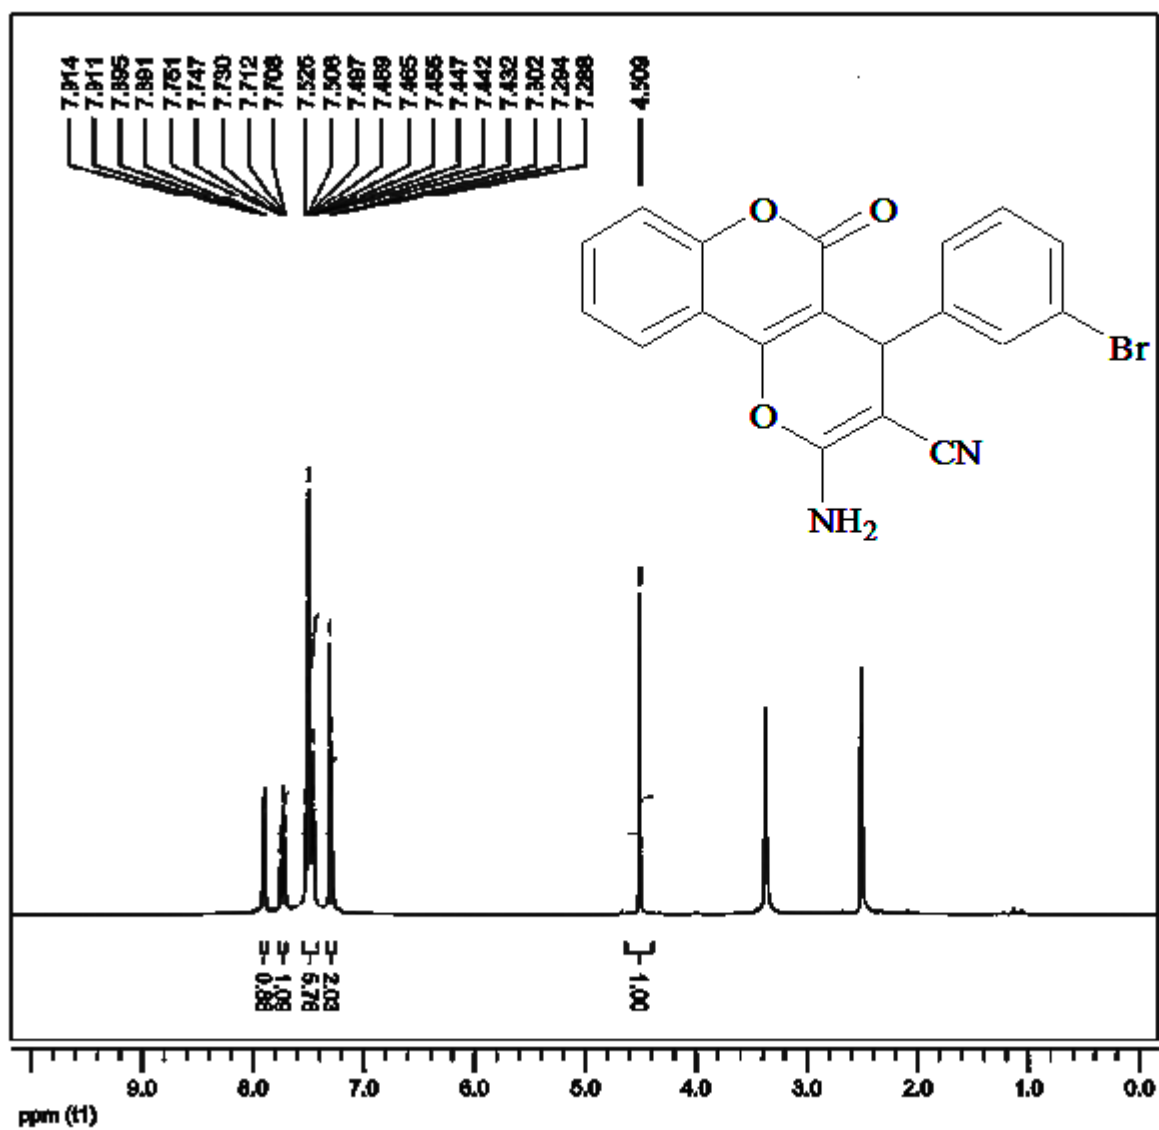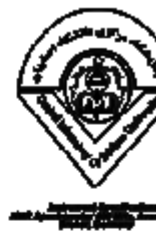

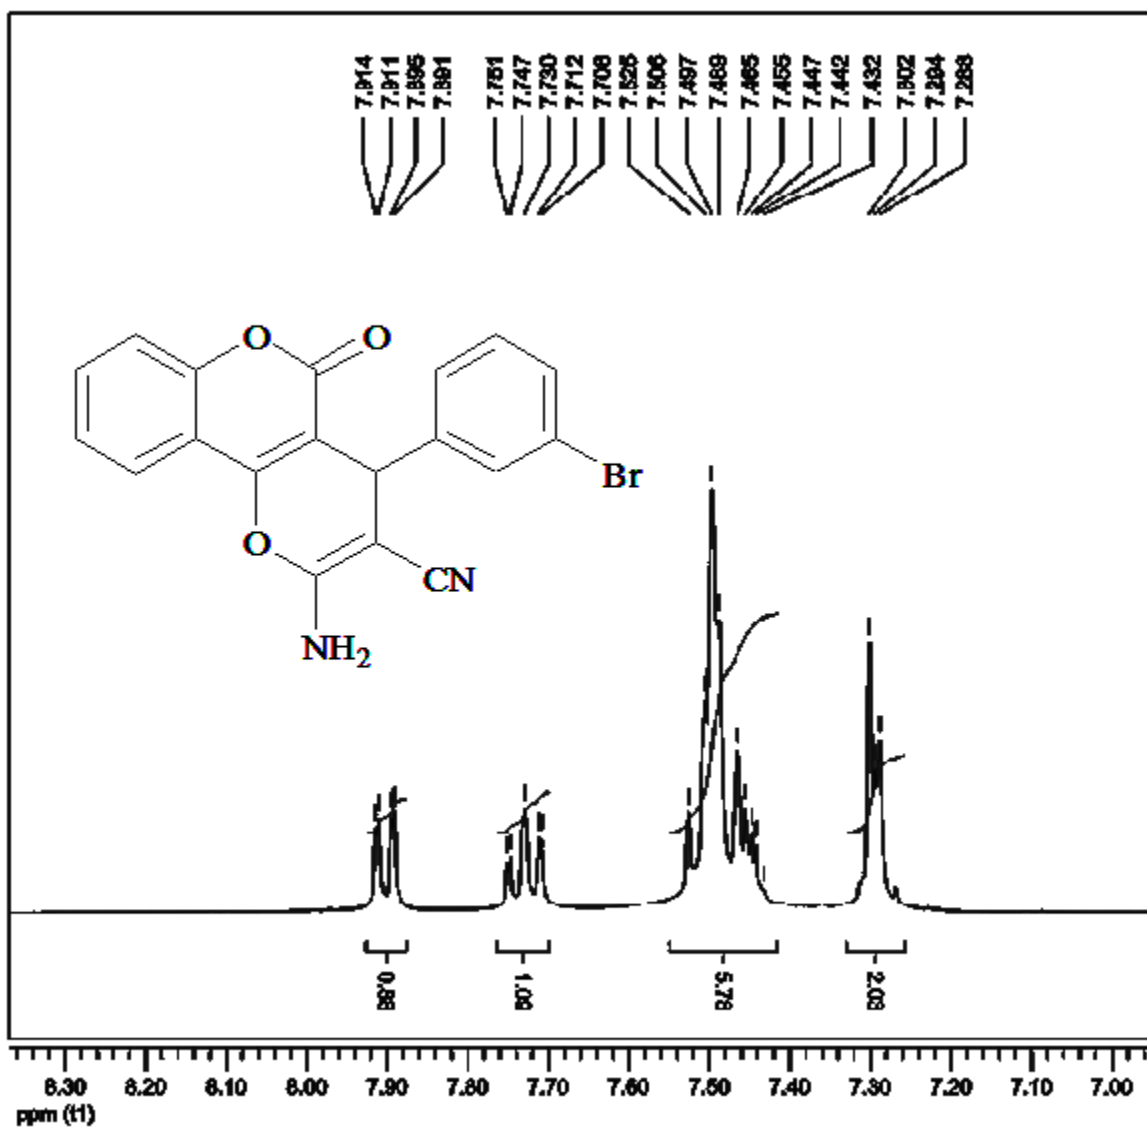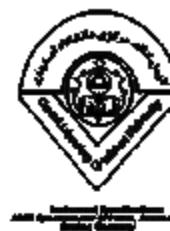



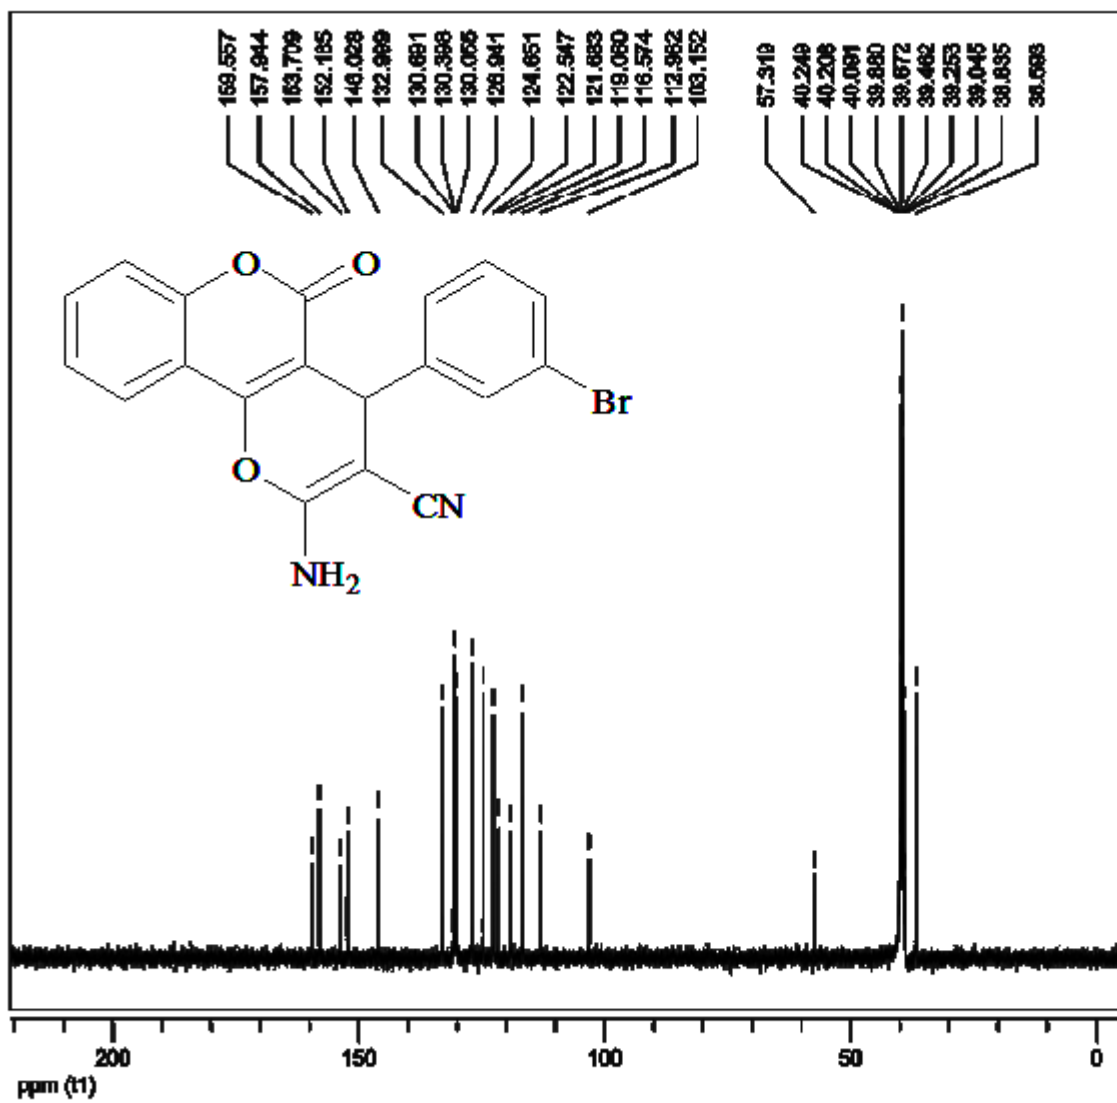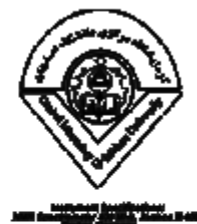

Supplement: c5nj01302j1.pdf [file c5nj01302j1.pdf]
